# Supplementary material for: The impact of lockdown on pediatric ED visits and hospital admissions during the COVID19 pandemic: a multicenter analysis and review of the literature
Source: Springer Nature journal article supplement (doi:10.1007/s00431-021-04015-0), 2021-03-15
Supplement: MOESM1 [file 18966940]

**Supplementary Table S1. List of diagnoses in each category**

| <b>Group 1<br/>(communicable infection)</b> | <b>Group 2<br/>(infection-related)</b> | <b>Group 3<br/>(noncommunicable infection)</b> | <b>Group 4<br/>Non-infectious</b>       |
|---------------------------------------------|----------------------------------------|------------------------------------------------|-----------------------------------------|
| Upper airway infection                      |                                        | Endocarditis                                   | Gastro-intestinal disease*              |
| Laryngitis subglottica                      | Asthma / Reactive airways              | Vulvovaginitis                                 | Neurological disease*                   |
| Mastoiditis/ethmoiditis                     | Cystic Fibrosis                        | UTI / Pyelonephritis                           | Nephrological disease*                  |
| Sinusitis                                   | Myocarditis                            | Skeletal infections                            | Urological disease*                     |
| Whooping cough                              | Febrile convulsion                     | Granulopenic fever                             | Hematological disease*                  |
| Lower airway infection                      | Guillain-Barré                         |                                                | Malignant disease*                      |
| RSV                                         | Glomerulonephritis                     | Cat scratch disease                            | Ocular disease*                         |
| Gastro-enteritis                            | Acute rheumatic fever                  | Lyme disease                                   | Endocrine disease*                      |
| Hepatitis                                   | Henoch Schonlein                       | Appendicitis                                   | Cardiac disorder*                       |
| Meningitis/encephalitis                     | Kawasaki                               | Balanitis                                      | Immune deficiencies                     |
| Ocular infection                            | Reactive arthritis                     | Epididymitis                                   | JCA/JIA                                 |
| Sepsis                                      | Coxitis Fugax                          |                                                | Other autoimmune/ rheumatologic disease |
| Viral exanthema                             | ITP                                    |                                                | Myalgia/artralgia                       |
| Lymphadenitis                               | Diabetes Mellitus                      |                                                | Hip dysplasia                           |
| Mononucleosis infectiosa                    | Viral-induced wheezing                 |                                                | Congenital disorder                     |
| Scarlet fever                               | Invagination                           |                                                | Syndrome                                |
| Viral infection NOS                         |                                        |                                                | Non-infectious exanthema                |
| Varicella zoster infection                  |                                        |                                                | Metabolic disease                       |
| Other infectious disease                    |                                        |                                                | Laryngomalacia                          |
| Fever unknown origin                        |                                        |                                                | Aspiration                              |
| Laryngotrachobronchitis                     |                                        |                                                | BPD                                     |
| Tuberculosis                                |                                        |                                                | Breath holding spells                   |
| Parasitic intestinal infection              |                                        |                                                | Eating disorder                         |
| Skin infection                              |                                        |                                                | Excessive crying                        |
| Infection NOS                               |                                        |                                                | Psychiatric illness                     |
| Otitis media                                |                                        |                                                | Intoxication                            |
| Pericarditis                                |                                        |                                                | Coma                                    |
| Stomatitis                                  |                                        |                                                | Near-drowning                           |
| HIV                                         |                                        |                                                | Bum                                     |
|                                             |                                        |                                                | Anaphylaxis / allergic reaction         |
|                                             |                                        |                                                | Failure-to-thrive                       |
|                                             |                                        |                                                | Fatigue                                 |

Abbreviations: ITP: immune thrombocytopenic purpura RSV: respiratory syncytial virus, HIV: human immunodeficiency virus, UTI: urinary tract infection NOS: not otherwise specified, BPD: bronchopulmonary dysplasia. \* Includes all diagnoses in this area unless specified in group 1-3.

## Supplementary Text S2. Literature review search strategy

| Source                         | Total       | Unique hits after de-duplication |
|--------------------------------|-------------|----------------------------------|
| Embase.com                     | 1194        | 1179                             |
| Medline ALL Ovid               | 1037        | 279                              |
| Web of Science Core Collection | 513         | 166                              |
| CINAHL EBSCOhost               | 406         | 151                              |
| <b>Total</b>                   | <b>3150</b> | <b>1775</b>                      |

### Embase.com

('lockdown'/exp OR 'social distance'/exp OR 'social distancing'/exp OR 'social isolation'/de OR 'quarantine'/de OR 'coronavirus disease 2019'/de OR 'Severe acute respiratory syndrome coronavirus 2'/de OR ('pandemic'/de AND 'Coronavirus infection'/exp) OR (lockdown OR ((social) NEAR/3 (distan\* OR isolation\*)) OR quarantin\* OR covid-19 OR covid19 OR sars-cov-2 OR sars-cov2 OR (Home NEAR/3 confine\*) OR severe-acute-respiratory-syndrome-coronavirus-2 OR 2019-NCov OR 2019-novel-coronavirus OR coronavirus-disease-2019 OR coronavirus-pandemic OR Novel-2019-coronavirus OR school-closure\* OR daycare-closure\* OR day-care-closure\*):ab,ti) AND ('emergency ward'/exp OR 'hospital emergency service'/exp OR 'high dependency unit'/exp OR 'intensive care unit'/exp OR 'intermediate care unit'/exp OR 'nursing unit'/exp OR 'observation unit'/exp OR 'pediatric ward'/exp OR 'surgical ward'/exp OR 'hospital admission'/de OR 'emergency health service'/de OR 'emergency patient'/de OR (ward OR wards OR ((medium OR intensive OR paediatric OR pediatric OR low OR emergency) NEAR/3 (unit\*)) OR ((emergenc\*) NEAR/3 (department\* OR room\* OR unit\* OR visit\* OR service\* OR setting)) OR admission\* OR admitted\* OR icu OR picu OR nicu OR er OR ed OR (hospital\* NEAR/3 visit\*)):ab,ti) AND (child/exp OR adolescent/exp OR adolescence/exp OR 'child behavior'/de OR 'child parent relation'/de OR pediatrics/exp OR childhood/exp OR 'child nutrition'/de OR 'infant nutrition'/exp OR 'child welfare'/de OR 'child abuse'/de OR 'child advocacy'/de OR 'child development'/de OR 'child growth'/de OR 'child health'/de OR 'child health care'/exp OR 'child care'/exp OR 'childhood disease'/exp OR 'child death'/de OR 'child psychiatry'/de OR 'child psychology'/de OR 'pediatric ward'/de OR 'pediatric hospital'/de OR 'pediatric anesthesia'/de OR 'pediatric intensive care unit'/de OR 'neonatal intensive care unit'/de OR 'prematurity'/de OR (adolescen\* OR preadolescen\* OR infan\* OR newborn\* OR (new NEXT/1 born\*) OR baby OR babies OR neonat\* OR prematur\* OR pre-matur\* OR child\* OR kid OR kids OR toddler\* OR teen\* OR boy\* OR girl\* OR minors OR underag\* OR (under NEXT/1 (age\* OR aging OR ageing)) OR juvenil\* OR youth\* OR kindergar\* OR puber\* OR pubescen\* OR prepubescen\* OR prepubert\* OR pediatric\* OR paediatric\* OR school\* OR preschool\* OR highschool\* OR suckling\* OR PICU OR NICU OR PICUs OR NICUs):ab,ti,kw) AND [2020]/py

### Medline ALL Ovid

(Social Distance/ OR Social Isolation/ OR Quarantine/ OR coronavirus disease 2019/ OR Severe acute respiratory syndrome coronavirus 2/ OR (Pandemics/ AND Coronavirus Infections/) OR (lockdown OR ((social) ADJ3 (distan\* OR isolation\*)) OR quarantin\* OR covid-19 OR covid19 OR sars-cov-2 OR sars-cov2 OR (Home ADJ3 confine\*) OR severe-acute-respiratory-syndrome-coronavirus-2 OR 2019-NCov OR 2019-novel-coronavirus OR coronavirus-disease-2019 OR coronavirus-pandemic OR Novel-2019-coronavirus OR school-closure\* OR daycare-closure\* OR day-care-closure\*):ab,ti.) AND (Emergencies/ OR exp Emergency Service, Hospital/ OR Emergency Treatment/ OR exp Intensive Care Units/ OR Clinical Observation Units/ OR Patient Admission/ OR exp Emergency Medical Services/ OR (ward OR wards OR ((medium OR intensive OR paediatric OR pediatric OR low OR emergency) ADJ3 (unit\*)) OR ((emergenc\*) ADJ3 (department\* OR room\* OR unit\* OR visit\* OR service\* OR setting)) OR admission\* OR admitted\* OR icu OR picu OR nicu OR er OR ed OR (hospital\* ADJ3 visit\*)):ab,ti.) AND (exp Child/ OR exp Infant/ OR exp Adolescent/ OR exp "Child Behavior"/ OR exp "Parent Child Relations"/ OR exp "Pediatrics"/ OR "Child Nutrition Sciences"/ OR "Infant nutritional physiological phenomena"/ OR exp "Child Welfare"/ OR "Child Development"/ OR exp "Child Health Services"/ OR exp "Child Care"/ OR "Child Rearing"/ OR exp "Child development Disorders, Pervasive"/ OR "Child Psychiatry"/ OR "Child Psychology"/ OR "Hospitals, Pediatric"/ OR exp "Intensive Care Units, Pediatric"/ OR (adolescen\* OR preadolescen\* OR infan\* OR newborn\* OR (new ADJ born\*) OR baby OR babies OR neonat\* OR prematur\* OR pre-matur\* OR child\* OR kid OR kids

OR toddler\* OR teen\* OR boy\* OR girl\* OR minors OR underag\* OR (under ADJ (age\* OR aging OR ageing)) OR juvenil\* OR youth\* OR kindergar\* OR puber\* OR pubescen\* OR prepubescen\* OR prepubert\* OR pediatric\* OR paediatric\* OR school\* OR preschool\* OR highschool\* OR suckling\* OR PICU OR NICU OR PICUs OR NICUs).ab,ti,kw.) AND 2020.yr.

### **Web of Science Core Collection**

TS=(((lockdown OR ((social) NEAR/2 (distan\* OR isolation\*)) OR quarantin\* OR covid-19 OR covid19 OR sars-cov-2 OR sars-cov2 OR (Home NEAR/2 confine\*) OR severe-acute-respiratory-syndrome-coronavirus-2 OR 2019-NCoV OR 2019-novel-coronavirus OR coronavirus-disease-2019 OR coronavirus-pandemic OR Novel-2019-coronavirus OR school-closure\* OR daycare-closure\* OR day-care-closure\*)) AND ((ward OR wards OR ((medium OR intensive OR paediatric OR pediatric OR low OR emergency) NEAR/2 (unit\*)) OR ((emergenc\*) NEAR/2 (department\* OR room\* OR unit\* OR visit\* OR service\* OR setting)) OR admission\* OR admitted\* OR icu OR picu OR nicu OR er OR ed OR (hospital\* NEAR/2 visit\*)) AND ((adolescen\* OR preadolescen\* OR infan\* OR newborn\* OR (new NEAR/1 born\*) OR baby OR babies OR neonat\* OR prematur\* OR pre-matur\* OR child\* OR kid OR kids OR toddler\* OR teen\* OR boy\* OR girl\* OR minors OR underag\* OR (under NEAR/1 (age\* OR aging OR ageing)) OR juvenil\* OR youth\* OR kindergar\* OR puber\* OR pubescen\* OR prepubescen\* OR prepubert\* OR pediatric\* OR paediatric\* OR school\* OR preschool\* OR highschool\* OR suckling\* OR PICU OR NICU OR PICUs OR NICUs)))

### **CINAHL EBSCOhost**

(MH Social Distancing OR MH Social Isolation OR MH Quarantine OR MH COVID-19 OR (MH Disease Outbreaks AND MH Coronavirus Infections) OR TI(lockdown OR ((social) N2 (distan\* OR isolation\*)) OR quarantin\* OR covid-19 OR covid19 OR sars-cov-2 OR sars-cov2 OR (Home N2 confine\*) OR severe-acute-respiratory-syndrome-coronavirus-2 OR 2019-NCoV OR 2019-novel-coronavirus OR coronavirus-disease-2019 OR coronavirus-pandemic OR Novel-2019-coronavirus OR school-closure\* OR daycare-closure\* OR day-care-closure\*) OR AB(lockdown OR ((social) N2 (distan\* OR isolation\*)) OR quarantin\* OR covid-19 OR covid19 OR sars-cov-2 OR sars-cov2 OR (Home N2 confine\*) OR severe-acute-respiratory-syndrome-coronavirus-2 OR 2019-NCoV OR 2019-novel-coronavirus OR coronavirus-disease-2019 OR coronavirus-pandemic OR Novel-2019-coronavirus OR school-closure\* OR daycare-closure\* OR day-care-closure\*)) AND (MH Emergencies OR MH Emergency Service+ OR MH Emergency Treatment OR MH Intensive Care Units+ OR MH Observation Units OR MH Patient Admission OR MH Emergency Medical Services OR TI(ward OR wards OR ((medium OR intensive OR paediatric OR pediatric OR low OR emergency) N2 (unit\*)) OR ((emergenc\*) N2 (department\* OR room\* OR unit\* OR visit\* OR service\* OR setting)) OR admission\* OR admitted\* OR icu OR picu OR nicu OR er OR ed OR (hospital\* N2 visit\*)) OR AB(ward OR wards OR ((medium OR intensive OR paediatric OR pediatric OR low OR emergency) N2 (unit\*)) OR ((emergenc\*) N2 (department\* OR room\* OR unit\* OR visit\* OR service\* OR setting)) OR admission\* OR admitted\* OR icu OR picu OR nicu OR er OR ed OR (hospital\* N2 visit\*)) AND (MH Child+ OR MH Infant+ OR MH Adolescent+ OR MH "Child Behavior+" OR MH "Pediatrics+" OR MH "Child Health Services+" OR MH "Child Care+" OR MH "Child Rearing" OR MH "Hospitals, Pediatric" OR MH "Intensive Care Units, Pediatric" OR TI(adolescen\* OR preadolescen\* OR infan\* OR newborn\* OR (new N1 born\*) OR baby OR babies OR neonat\* OR prematur\* OR pre-matur\* OR child\* OR kid OR kids OR toddler\* OR teen\* OR boy\* OR girl\* OR minors OR underag\* OR (under N1 (age\* OR aging OR ageing)) OR juvenil\* OR youth\* OR kindergar\* OR puber\* OR pubescen\* OR prepubescen\* OR prepubert\* OR pediatric\* OR paediatric\* OR school\* OR preschool\* OR highschool\* OR suckling\* OR PICU OR NICU OR PICUs OR NICUs) OR AB(adolescen\* OR preadolescen\* OR infan\* OR newborn\* OR (new N1 born\*) OR baby OR babies OR neonat\* OR prematur\* OR pre-matur\* OR child\* OR kid OR kids OR toddler\* OR teen\* OR boy\* OR girl\* OR minors OR underag\* OR (under N1 (age\* OR aging OR ageing)) OR juvenil\* OR youth\* OR kindergar\* OR puber\* OR pubescen\* OR prepubescen\* OR prepubert\* OR pediatric\* OR paediatric\* OR school\* OR preschool\* OR highschool\* OR suckling\* OR PICU OR NICU OR PICUs OR NICUs))

Supplementary Figure S3. Hospital admission:ED visit ratio

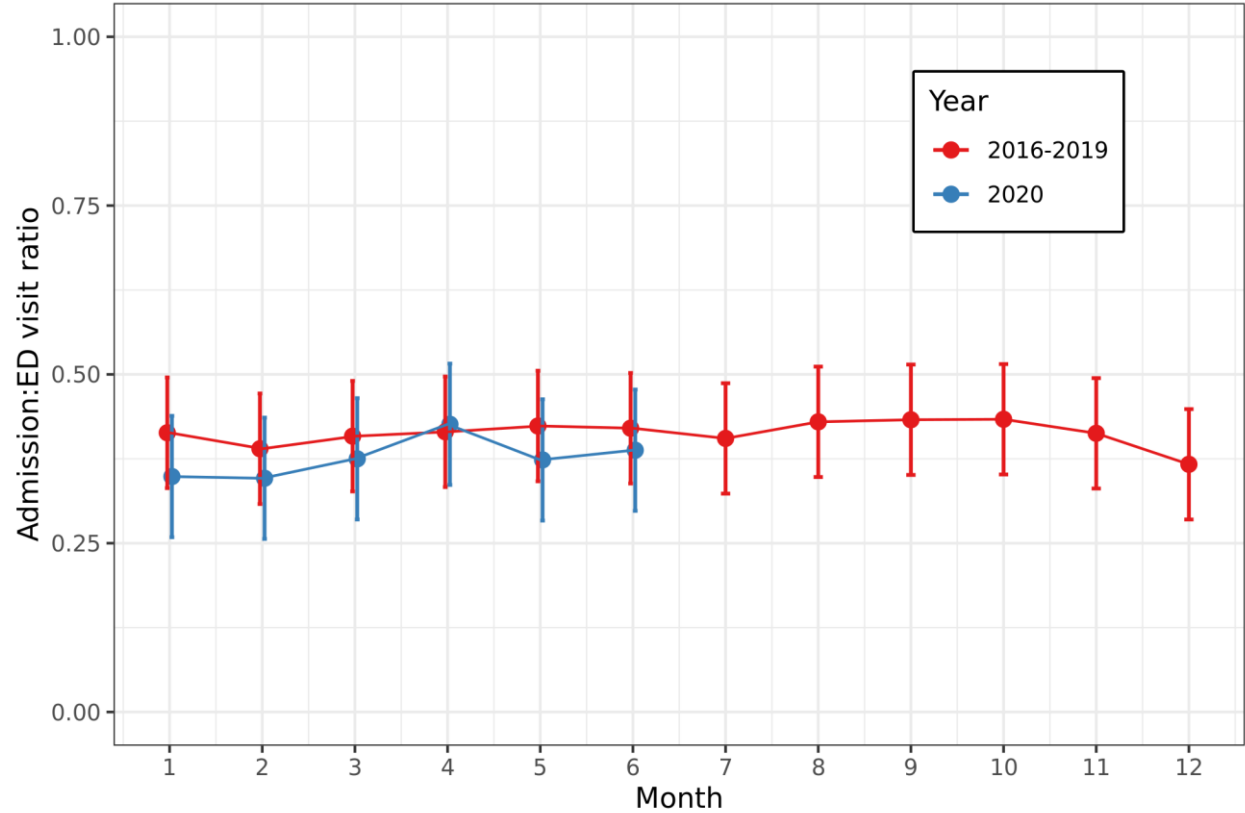

Estimated mean (95% CI) Admission:ED visit ratio per month for the 8 study centers for 2016-2019 (red) and 2020 (blue).

**Supplementary Table S4. Estimated effects per month per category**

| All ED visits |                |                 |          |
|---------------|----------------|-----------------|----------|
| Month         | Difference (%) | 95% CI          | p-value* |
| January       | -1.67          | -9.96 – 6.62    | 1.000    |
| February      | -9.17          | -17.46 – -0.88  | 0.541    |
| March         | -36.26         | -44.55 – -27.98 | <0.001   |
| April         | -59.31         | -67.60 – -51.02 | <0.001   |
| May           | -47.79         | -56.08 – -39.50 | <0.001   |
| June          | -40.60         | -48.89 – -32.31 | <0.001   |

| ED visits group 1 (communicable infections) |                |                 |              |
|---------------------------------------------|----------------|-----------------|--------------|
| Month                                       | Difference (%) | 95% CI          | p-value*     |
| January                                     | -2.45          | -14.51 – 9.61   | 1.000        |
| February                                    | -18.66         | -30.72 – -6.60  | <b>0.044</b> |
| March                                       | -39.98         | -52.04 – -27.92 | <0.001       |
| April                                       | -75.94         | -88.00 – -63.88 | <0.001       |
| May                                         | -67.35         | -79.41 – -55.29 | <0.001       |
| June                                        | -62.85         | -74.91 – -50.79 | <0.001       |

| ED visits group 2 (infection-related) |                |                 |          |
|---------------------------------------|----------------|-----------------|----------|
| Month                                 | Difference (%) | 95% CI          | p-value* |
| January                               | -0.62          | -18.16 – 16.91  | 1.000    |
| February                              | -14.54         | -32.08 – 3.00   | 1.000    |
| March                                 | -47.06         | -64.59 – -29.52 | <0.001   |
| April                                 | -71.33         | -88.87 – -53.80 | <0.001   |
| May                                   | -67.46         | -85.00 – -49.92 | <0.001   |
| June                                  | -38.76         | -56.30 – -21.22 | <0.001   |

| ED visits group 3 (non-communicable infections) |                |                |          |
|-------------------------------------------------|----------------|----------------|----------|
| Month                                           | Difference (%) | 95% CI         | p-value* |
| January                                         | -3.70          | -31.99 – 24.59 | 1.000    |
| February                                        | 20.39          | -7.90 – 48.68  | 1.000    |
| March                                           | -5.40          | -33.69 – 22.88 | 1.000    |
| April                                           | -7.73          | -36.02 – 20.55 | 1.000    |
| May                                             | -29.17         | -57.46 – -0.89 | 0.778    |
| June                                            | -14.60         | -42.89 – 13.69 | 1.000    |

| <b>ED visits group 4 (non-infectious disease)</b> |                       |                 |                  |
|---------------------------------------------------|-----------------------|-----------------|------------------|
| <b>Month</b>                                      | <b>Difference (%)</b> | <b>95% CI</b>   | <b>p-value*</b>  |
| <b>January</b>                                    | 0.99                  | -9.18 – 11.16   | 1.000            |
| <b>February</b>                                   | 5.78                  | -4.39 – 15.94   | 1.000            |
| <b>March</b>                                      | -28.56                | -38.72 – -18.39 | <b>&lt;0.001</b> |
| <b>April</b>                                      | -36.16                | -46.33 – -25.99 | <b>&lt;0.001</b> |
| <b>May</b>                                        | -23.51                | -33.68 – -13.35 | <b>&lt;0.001</b> |
| <b>June</b>                                       | -24.54                | -34.70 – -14.37 | <b>&lt;0.001</b> |

| <b>All admissions</b> |                       |                 |                  |
|-----------------------|-----------------------|-----------------|------------------|
| <b>Month</b>          | <b>Difference (%)</b> | <b>95% CI</b>   | <b>p-value*</b>  |
| <b>January</b>        | -16.50                | -26.47 – -6.53  | <b>0.021</b>     |
| <b>February</b>       | -17.28                | -27.25 – -7.31  | <b>0.012</b>     |
| <b>March</b>          | -40.94                | -50.91 – -30.97 | <b>&lt;0.001</b> |
| <b>April</b>          | -56.80                | -66.77 – -46.83 | <b>&lt;0.001</b> |
| <b>May</b>            | -53.96                | -63.93 – -43.99 | <b>&lt;0.001</b> |
| <b>June</b>           | -43.68                | -53.65 – -33.72 | <b>&lt;0.001</b> |

| <b>Admissions group 1 (communicable infections)</b> |                       |                 |                  |
|-----------------------------------------------------|-----------------------|-----------------|------------------|
| <b>Month</b>                                        | <b>Difference (%)</b> | <b>95% CI</b>   | <b>p-value*</b>  |
| <b>January</b>                                      | -13.94                | -28.21 – 0.33   | 1.000            |
| <b>February</b>                                     | -23.81                | -38.08 – -9.54  | <b>0.019</b>     |
| <b>March</b>                                        | -46.59                | -60.86 – -32.32 | <b>&lt;0.001</b> |
| <b>April</b>                                        | -77.29                | -91.56 – -63.02 | <b>&lt;0.001</b> |
| <b>May</b>                                          | -72.41                | -86.68 – -58.14 | <b>&lt;0.001</b> |
| <b>June</b>                                         | -68.55                | -82.82 – -54.28 | <b>&lt;0.001</b> |

| <b>Admissions group 2 (infection-related)</b> |                       |                  |                  |
|-----------------------------------------------|-----------------------|------------------|------------------|
| <b>Month</b>                                  | <b>Difference (%)</b> | <b>95% CI</b>    | <b>p-value*</b>  |
| <b>January</b>                                | -11.85                | -36.86 – 13.17   | 1.000            |
| <b>February</b>                               | -14.19                | -39.21 – 10.82   | 1.000            |
| <b>March</b>                                  | -43.51                | -68.53 – -18.49  | <b>0.012</b>     |
| <b>April</b>                                  | -78.28                | -103.30 – -53.27 | <b>&lt;0.001</b> |
| <b>May</b>                                    | -78.42                | -103.43 – -53.40 | <b>&lt;0.001</b> |
| <b>June</b>                                   | -39.61                | -64.63 – -14.60  | <b>&lt;0.034</b> |

| Admissions group 3 (non-communicable infections) |                |                |          |
|--------------------------------------------------|----------------|----------------|----------|
| Month                                            | Difference (%) | 95% CI         | p-value* |
| January                                          | 10.75          | -39.96 – 61.47 | 1.000    |
| February                                         | 14.01          | -36.71 – 64.72 | 1.000    |
| March                                            | -28.07         | -78.78 – 22.65 | 1.000    |
| April                                            | 9.57           | -41.15 – 60.28 | 1.000    |
| May                                              | -26.10         | -76.82 – 24.61 | 1.000    |
| June                                             | -18.55         | -69.26 – 32.17 | 1.000    |

| Admissions group 4 (non-infectious disease) |                |                 |                  |
|---------------------------------------------|----------------|-----------------|------------------|
| Month                                       | Difference (%) | 95% CI          | p-value*         |
| January                                     | -20.36         | -33.37 – -7.34  | <b>0.039</b>     |
| February                                    | -9.23          | -22.25 – 3.78   | 1.000            |
| March                                       | -33.35         | -46.37 – -20.34 | <b>&lt;0.001</b> |
| April                                       | -30.69         | -43.71 – -17.68 | <b>&lt;0.001</b> |
| May                                         | -30.37         | -43.39 – -17.36 | <b>&lt;0.001</b> |
| June                                        | -24.21         | -37.22 – -11.19 | <b>0.005</b>     |

Supplementary Figure S5. Incidence of selected diagnoses

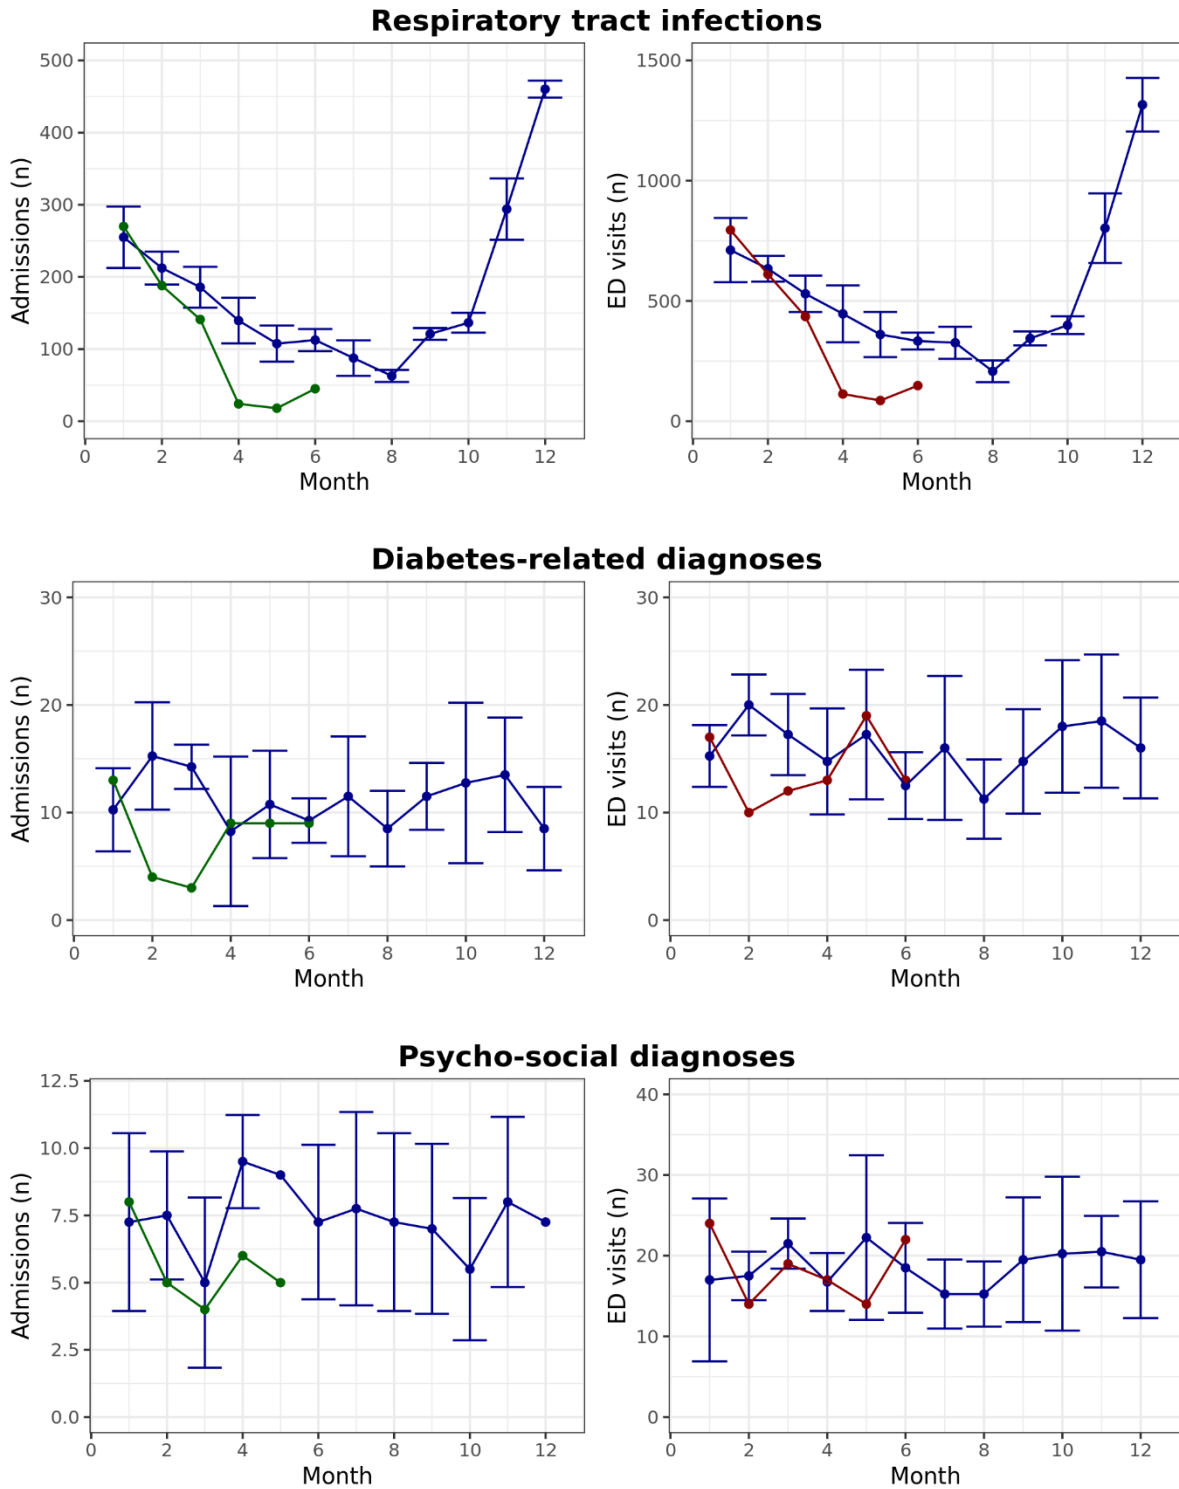



Supplementary Figure S6 – Flowchart literature review

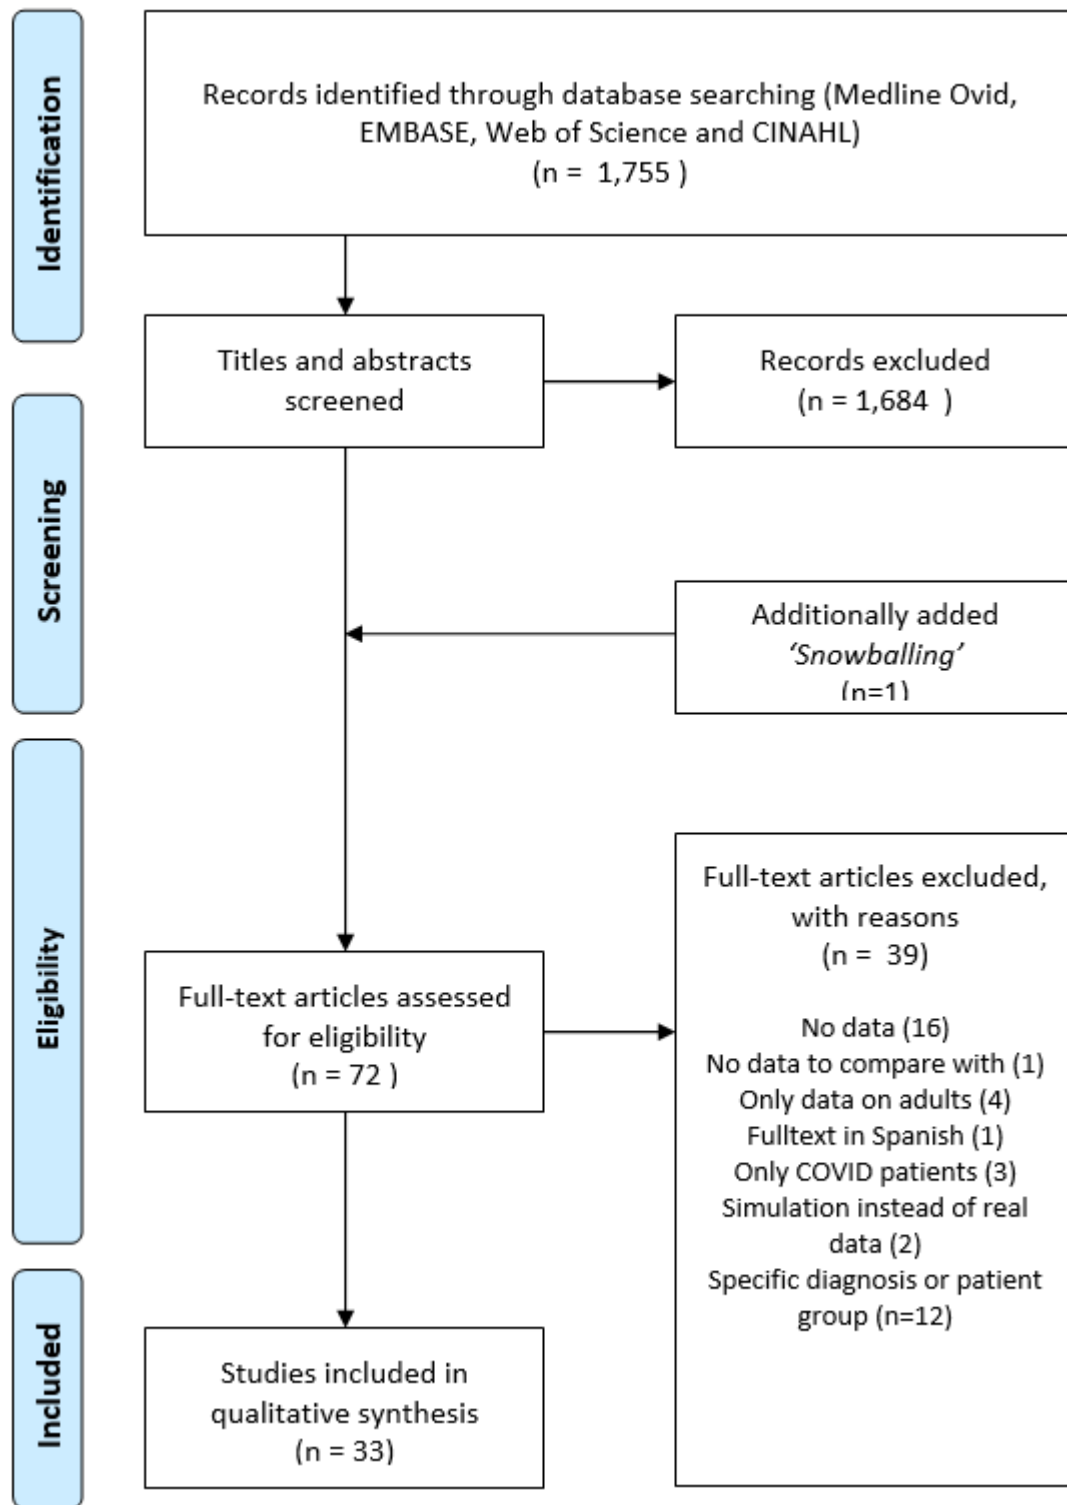

Supplementary Figure S7 – Correlation reduction in ED visits and maximum lockdown stringency

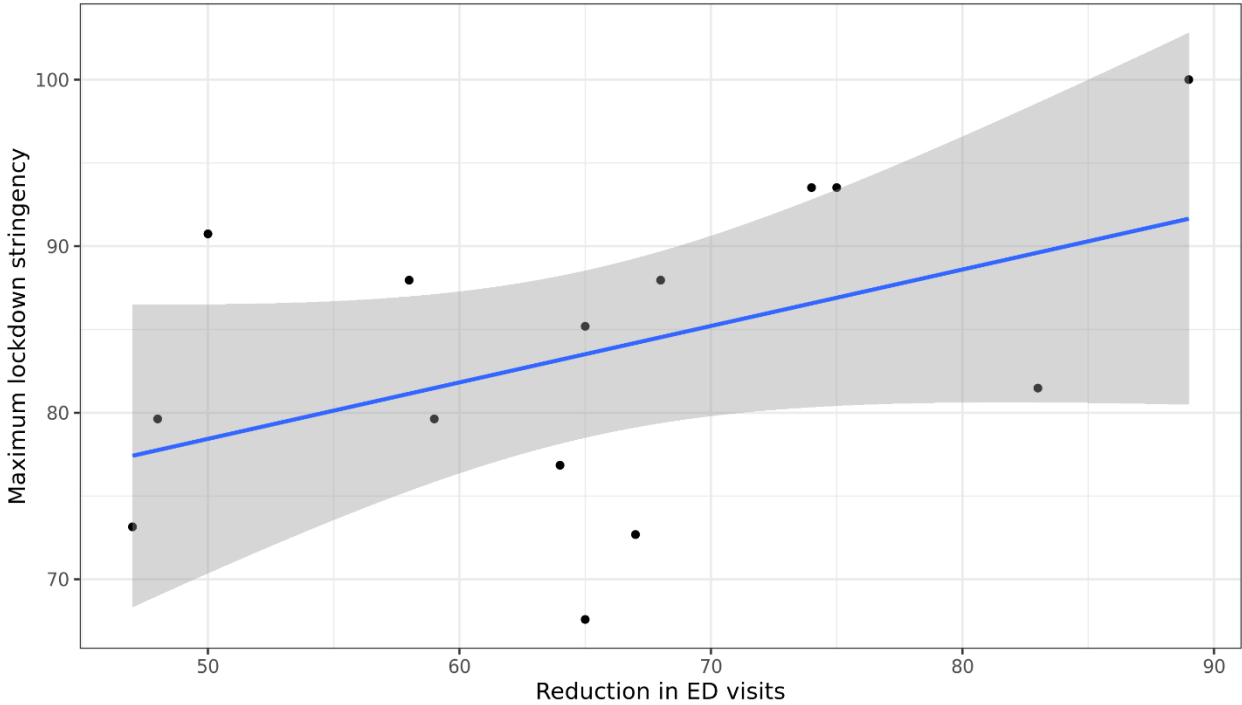

Correlation between the reduction in ED visits per country and the maximum lockdown stringency. Each dot represents a country. Blue line and shaded area represents the linear regression line and 95% confidence interval.
